# Supplementary material for: Incremental Value of the CRUSADE, ACUITY, and HAS‐BLED Risk Scores for the Prediction of Hemorrhagic Events After Coronary Stent Implantation in Patients Undergoing Long or Short Duration of Dual Antiplatelet Therapy
Source: PubMed Central journal article supplement — J Am Heart Assoc. 2015 Dec 7;4(12):e002524. doi: 10.1161/JAHA.115.002524 (PMC4845267; doi:10.1161/jaha.115.002524), 2015-12-07
Supplement: JAH3-4-e002524-s001.pdf [file JAH3-4-e002524-s001.pdf]

## **SUPPLEMENTAL MATERIAL**

Supplemental Table

P 2

**Table S1. Bleeding risk score calculation in the PRODIGY trial.**

---

| <b>CRUSADE SCORE (N=1948)</b>        |              |
|--------------------------------------|--------------|
| <b>Baseline hematocrit, %</b>        |              |
| <31                                  | 102 (5.2%)   |
| 31–33.9                              | 131 (6.7%)   |
| 34–36.9                              | 230 (11.8%)  |
| 37–39.9                              | 426 (21.9%)  |
| ≥40                                  | 1059 (54.4%) |
| <b>Creatinine clearance,* mL/min</b> |              |
| ≤15                                  | 26 (1.3%)    |
| >15-30                               | 48 (2.5%)    |
| >30-60                               | 537 (5.2%)   |
| >60-90                               | 649 (33.3%)  |
| >90-120                              | 541 (27.8%)  |
| >120                                 | 180 (9.2%)   |
| <b>Heart rate (bpm)</b>              |              |
| ≤70                                  | 1231 (63.2%) |
| 71-80                                | 378 (19.4%)  |
| 81-90                                | 212 (10.9%)  |
| 91-100                               | 97 (5.0%)    |
| 101-110                              | 18 (0.9%)    |
| 111-120                              | 5 (0.2%)     |
| >120                                 | 7 (0.3%)     |
| <b>Sex</b>                           |              |
| Male                                 | 1495 (76.7%) |

|        |             |
|--------|-------------|
| Female | 453 (23.3%) |
|--------|-------------|

**Signs of CHF at presentation**

|    |              |
|----|--------------|
| No | 1836 (94.2%) |
|----|--------------|

|     |            |
|-----|------------|
| Yes | 112 (5.8%) |
|-----|------------|

**Prior vascular disease**

|    |              |
|----|--------------|
| No | 1696 (87.1%) |
|----|--------------|

|     |             |
|-----|-------------|
| Yes | 252 (12.9%) |
|-----|-------------|

**Diabetes Mellitus**

|    |              |
|----|--------------|
| No | 1475 (75.7%) |
|----|--------------|

|     |             |
|-----|-------------|
| Yes | 473 (24.3%) |
|-----|-------------|

**Systolic blood pressure, mm Hg**

|     |           |
|-----|-----------|
| ≤90 | 43 (2.2%) |
|-----|-----------|

|        |           |
|--------|-----------|
| 91-100 | 69 (3.5%) |
|--------|-----------|

|         |             |
|---------|-------------|
| 101-120 | 225 (11.6%) |
|---------|-------------|

|         |              |
|---------|--------------|
| 121-180 | 1472 (75.6%) |
|---------|--------------|

|         |           |
|---------|-----------|
| 181-200 | 85 (4.4%) |
|---------|-----------|

|      |           |
|------|-----------|
| >200 | 54 (2.8%) |
|------|-----------|

---

**ACUITY SCORE (N=1970)**

---

**Gender**

|      |              |
|------|--------------|
| Male | 1517 (77.0%) |
|------|--------------|

|        |             |
|--------|-------------|
| Female | 453 (23.0%) |
|--------|-------------|

**Age**

|     |            |
|-----|------------|
| <50 | 151 (7.7%) |
|-----|------------|

|       |             |
|-------|-------------|
| 50-59 | 336 (17.1%) |
| 60-69 | 565 (27.5%) |
| 70-79 | 649 (32.9%) |
| ≥80   | 269 (13.7%) |

#### **Serum Creatinine**

|         |             |
|---------|-------------|
| ≤1      | 916 (46.5%) |
| 1-1.2   | 565 (28.7%) |
| 1.2-1.4 | 224 (11.4%) |
| 1.4-1.6 | 136 (6.9%)  |
| 1.6-1.8 | 41 (2.1%)   |
| 1.8-2.0 | 25 (1.3%)   |
| ≥2.0    | 63 (3.2%)   |

#### **White Blood Cell Count (giga/L)**

|       |              |
|-------|--------------|
| <10   | 1475 (74.9%) |
| 10-11 | 275 (14.0%)  |
| 12-13 | 116 (5.9%)   |
| 14-15 | 56 (2.8%)    |
| 16-17 | 30 (1.5%)    |
| 18-19 | 9 (0.5%)     |
| ≥20   | 9 (0.5%)     |

**Previous Anemia** 25 (1.3%)

#### **Clinical Presentation**

|                   |             |
|-------------------|-------------|
| STEMI             | 670 (34.0%) |
| NSTEMI            | 460 (23.4%) |
| Normal Biomarkers | 840 (42.6%) |

**Antithrombotic medication** Not Applicable

---

**HAS BLEED SCORE (N=1968)**

---

**Hypertension (sBP >160 mmHg)** 1445 (73.4%)

**Abnormal renal function (ClCr < 50ml/min)** 331 (16.8%)

**Abnormal liver function (** 2 (0.1%)

**Elderly (Age > 65y)** 1215 (61.7%)

**Previous Stroke** 14 (0.7%)

**Previous Bleeding** 12 (0.6%)

**Labile INR** Not Applicable

**Use of drugs** 0 (0.0%)

**Use of alcohol** 1 (0.1%)

---
